# Supplementary material for: Electronic data review, client reminders, and expanded clinic hours for improving cervical cancer screening rates after the COVID-19 pandemic shutdowns: A multicomponent quality improvement program
Source: eLife. 2023 Aug 22;12:e85724. doi: 10.7554/eLife.85724 (PMC10471159; doi:10.7554/eLife.85724)
Supplement: Figure 4—source data 1. [file elife-85724-fig4-data1.xlsx]

## Sheet: Sheet1
Date	Year	Month	Number Patients who met Cervical Cancer Screening standard	Number of Patients who are eligible for Cervical Cancer Screening	Percentile	Control Line (Mean)	Upper Control Limit	Lower Control Limit
2019-01-01	2019	Jan	38326	55880	68.6	68.9	75.4	62.3
2019-02-01		Feb	38434	56032	68.6	68.9	75.4	62.3
2019-03-01		Mar	38246	55728	68.6	68.9	75.4	62.3
2019-04-01		Apr	38156	55348	68.9	68.9	75.4	62.3
2019-05-01		May	38344	55606	69	68.9	75.4	62.3
2019-06-01		Jun	39184	56652	69.2	68.9	75.4	62.3
2019-07-01		Jul	39192	56442	69.4	68.9	75.4	62.3
2019-08-01		Aug	39210	55906	70.1	68.9	75.4	62.3
9/1//2019		Sep	39512	56314	70.2	68.9	75.4	62.3
2019-10-01		Oct	39654	65454	70.2	68.9	75.4	62.3
2019-11-01		Nov	39826	56678	70.3	68.9	75.4	62.3
2019-12-01		Dec	39974	56936	70.2	68.9	75.4	62.3
2020-01-01	2020	Jan	39990	57128	70	68.9	75.4	62.3
2020-02-01		Feb	40120	57288	70	68.9	75.4	62.3
2020-03-01		Mar	39960	57440	69.6	68.9	75.4	62.3
2020-04-01		Apr	38490	56376	68.3	68.9	75.4	62.3
2020-05-01		May	38080	56010	68	68.9	75.4	62.3
2020-06-01		Jun	36270	54430	66.6	68.9	75.4	62.3
2020-07-01		Jul	35924	55370	64.9	68.9	75.4	62.3
2020-08-01		Aug	36362	56856	64	68.9	75.4	62.3
9/1//2020		Sep	36447	57335	63.6	68.9	75.4	62.3
2020-10-01		Oct	36824	57965	63.5	68.9	75.4	62.3
2020-11-01		Nov	37340	58572	63.8	68.9	75.4	62.3
2020-12-01		Dec	36026	53681	67.1	68.9	75.4	62.3
2021-01-01	2021	Jan	35610	52740	67.5	68.9	75.4	62.3
2021-02-01		Feb	35754	52928	67.6	68.9	75.4	62.3
2021-03-01		Mar	36432	53457	68.2	68.9	75.4	62.3
2021-04-01		Apr	37162	54132	68.7	68.9	75.4	62.3
2021-05-01		May	38116	54340	70.1	68.9	75.4	62.3
2021-06-01		Jun	38490	53826	71.5	68.9	75.4	62.3
2021-07-01		Jul	38724	53348	72.6	68.9	75.4	62.3
2021-08-01		Aug	39040	53678	72.7	68.9	75.4	62.3
9/1//2021		Sep	39734	54740	72.6	68.9	75.4	62.3
2021-10-01		Oct	40080	55242	72.6	68.9	75.4	62.3
2021-11-01		Nov	39454	55552	71	68.9	75.4	62.3
2021-12-01		Dec	19548	27518	71	68.9	75.4	62.3
