# Supplementary material for: Electronic data review, client reminders, and expanded clinic hours for improving cervical cancer screening rates after the COVID-19 pandemic shutdowns: A multicomponent quality improvement program
Source: eLife. 2023 Aug 22;12:e85724. doi: 10.7554/eLife.85724 (PMC10471159; doi:10.7554/eLife.85724)
Supplement: Figure 5—source data 1. [file elife-85724-fig5-data1.xlsx]

## Sheet: Sheet1
Month/Year	Number of Patients Overdue Cervical Cancer Screening
2019-12-31	8467
2020-12-31	8812
2021-12-31	7962
2022-12-31	8668
