# Supplementary material for: Electronic data review, client reminders, and expanded clinic hours for improving cervical cancer screening rates after the COVID-19 pandemic shutdowns: A multicomponent quality improvement program
Source: eLife. 2023 Aug 22;12:e85724. doi: 10.7554/eLife.85724 (PMC10471159; doi:10.7554/eLife.85724)
Supplement: Figure 6—source data 1. [file elife-85724-fig6-data1.xlsx]

## Sheet: Sheet1
Patient Number	NOTES			pap result	colpo result	leep result	2021-06-06	2021-06-29	2021-10-08
1	unable to leave a message	2nd call letter sent
2	scheduled for 3/19	no show lvm letter sent
3	Scheduled for 3/19	pt declined to r/s and have a pap
4	pap done out side EBNHC
5	SCheduled for 3/23	pap was done		nilm
6	Scheduled for 3/19	pap was done		lsil hpv+	neg
7	Scheduled for 3/19	pap was done		nilm
8	scheduled for 3/23	pap was done		nilm
9	Scheduled 3/10	pap was done		nilm
10	scheuled 5/10	pap done		hpv	no
11	Pt been seeing at Tufts
12	scheduled for 4/29	pap done		nilm
13	R/s for 6/14	no show lvm
14	scheuled 2/26	pap was done		nilm
15	scheuled 3/19	pap was done		nilm
16	scheduled for 7/1	2nd call letter sent							letter
17	pap done out side EBNHC
18	SCheuled 3/19	pap was done		nilm
19	SCheuled 3/11	pap was done
20	SCheuled 3/3	pap was done		nilm
21	Scheduled 3/19	pap was done		nilm
22	unable to leave a message leter sent	letter sent
23	scheduled 6/15	pap was done		nilm					done
24	Scheduled 3/23	pap was done		nilm
25	scheduled 3/19	pap was done		nilm
26	pt with no ins will call after	2nd call letter sent
27	scheduled for 3/19	pt canceled /pt declined pap
28	scheduled 2/24	done at FM on 4/14
29	phone out of service letter sent	letter sent
30	pt TX her care
31	scheduled 3/11	pt no show twice /letter sent
32	scheduled 3/19	pap was done		nilm
33	R/s for 6/28	pap was done		nilm					done
34	R/s 8/27	no show for 6/17 or 8/27							dnka
35	lvm	4th call letter sent
36	unable to leave a message letter sent	Letter sent
37	lvm	3rd call letter sent
38	pt TX her care
39	scheduled for 3/19	pap was done		nilm
40	scheduled 3/23	pap was done		nilm
41	rescheduled for 5/19	pt cancelled twice					x pap clinic	cxl again
42	rescheduled for 4/28	pap done		nilm
43	scheduled for 3/31	pap was done		hpv	missed
44	phone out letter sent
45	rescheduled for 4/22	dnka/letter sent
46	we will call back per pt	call LVM/letter sent						letter
47	scheduled for 3/19	pap was done		nilm
48	reschedule 6/4	no show						dnka
49	Scheduled for 3/19	pap was done		nilm
50	scheduled for 3/19	pap was done		nilm
51	scheduled 5/26	pap done		nilm			x
52	scheduled for 3/31	pap was done		nilm
53	scheduled for 3/19	pap was done		nilm
54	scheduled for 6/26	pap was done		ascus hpv	cin2	observation		done
55	lvm	2nd call pt moved to california
56	lvm	pt with no insurance
57	scheduled for 4/7	pt no show lvm/leter sent
58	schedule for 5/19	pap done		ascus hpv	neg		pap clinic
59	scheduled 3/23	pap was done		lsil hpv	neg
60	Scheduled for 3/19	pap was done		nilm
61	scheduled for 3/29	not done actually p review		letter
62	rescheduled 6/12	no show
63	rescheduled 5/18	pt cancelled twice					x	cxl again
64	pt prefer her pcp
65	scheduled for 6/12	No show					x	dnka
66	was done 3/12	pap done		lsil hpv	neg
67	pt prefer her pcp
68	2nd call letter send phone out	letter sent
69	2nd call lvm	letter sent
70	scheduled for 3/23	pap was done		nilm
71	3rd call pt will call back
72	rescheduled for 5/12	pap done		hpv	pap 1 yr
73	rescheduled 6/26	pap was done		nilm			pap clinic	done
74	unable to lvm letter sent.	letter sent
75	scheduled for 3/4	colpo was done
76	scheduled for 3/23	pap was done		lsil hpv	neg
77	pap was done on 5/7	done with Pcp		nilm				done
78	rescheduled for 5/19	pap done		nilm			x
79	pt declined the pap	declined
80	schedule for 5/19	pap was done		nilm			x
81	scheduled for 3/26	pap was done		nilm
82	2nd call lvm with Husband	letter sent						letter
83	scheduled for 4/13	no show 3calls letter sent
84	2nd call	letter sent
85	2nd call	letter sent
86	2nd call	letter sent
87	scheduled 3/23	pap was done		lsil hpv	neg
88	scheduled for 3/23	pap was done		hpv	pap 1 yr
89	TX ou side state
90	scheduled for 3/23	pap was done		ascus only	pap 1 yr
91	scheduled 3/23	pap was done		lsil hpv	pap 1 yr
92	scheduled 3/2	pap was done		nilm
93	2nd call	letter sent
94	scheduled 3/23	pap was done		nilm
95	2nd call	letter sent
96	scheduled 3/10	pap was done		lsil 18/45	neg
97	2ns call	letter sent
98	scheduled 2/25	pap was done		nilm
99	2nd call	leter sent
100	Scheduled for 3/23	pap was done		hpv	neg
101	scheduled for 3/23	pap was done		ascus only	pap 1 yr
102	FM	pap was done		nilm
103	scheduled for 3/23	pap was done		nilm
104	Rescheduled 5/26	pap done		nilm			x
105	scheduled 3/23	pap was done		nilm
106	2nd call	letter sent
107	no show	3 calls letetr sent
108	PCP	pap was done		nilm
109	Rescheduled for 5/3	DNKA, 3 calls/letter sent
110	2nd call	letter sent
111	scheduled for 3/23	pap was done		ascus	pap 1 yr
112	rescheduled for 4/29	pap done		lsil hpv	pap 1 yr
113	2nd call	letter sent
114	PCP	pap was done		ascus only	pap 1 yr
115	scheuled for 3/23	pap was done		nilm
116	scheduled for 3/23	pap was done		nilm
117	scheduled 3/29	pap was done		lsil hpv	neg
118	2nd call	letter sent
119	scheduled 3/29	pap was done		lsil	pap 1 yr
120	scheduled 3/29	pap was done		nilm
121	2nd call	letter sent
122	2nd call	letter sent
123	scheduled 3/29	pap was done		nilm
124	scheduled 4/1	no show letter sent
125	scheduled 3/29	pap was done		nilm
126	scheduled 4/6	pap was done		nilm
127	scheduled 3/29	pap was done		nilm
128	scheduled 3/29	pap was done		lsil or more hpv	ecc +, unsatis	neg
129	scheduled 3/29	no show letter sent
130	unable to leave message letter sent	letter sent
131	rescheduled 5/4	pap done		nilm
132	scheduled 5/10	no show lvm letter sent
133	pap was done on 2/23	pap was done		nilm
134	scheduled 3/26	pap was done		hpv	neg
135		pap done		nilm
136	scheduled 3/24	pap was done		nilm
137	scheduled 4/5	pap was done		18/45	neg
138	rescheduled 8/12	pap was done		ascus hpv	pap 1 yr			pending	done
139	rescheduled 4/27	pap done		lsil hpv	neg
140	scheduled 3/31	pap was done		ascus hpv	pap 1 yr
141	rescheduled 5/10	pap done		nilm
142	letter sent	letter sent
143	scheduled 3/17	pap was done		hpv	pap 1 yr
144	scheduled 3/31	pap was done		hpv	pap 1 yr
145	scheduled 3/17	pap was done		hpv	dnka	h/o cin2
146	scheduled 3/24	pap was done		nilm
147	dnka	3 calls letter sent
148	scheduled 3/17	pap was done		nilm
149	scheduled 3/11	pap was done		ascus only	pap 1 yr
150	scheduled 3/3	pap was done		hpv	pap 1 yr
151	scheuled 3/17	pap was done		nilm
	first review	rescheduled	19
		letter	27					0.22
		dnka letter	6					0.04
		done	66					0.44
			118
	2nd review 5/14/21
	pcp 1%		2					1.36986
	OSC 3%		4					2.73973
	moved 1%		2					1.36986
	dnka/cxl 7%		10					6.84932
	already scheduled 1%		1					0.684932
	pap done 53%		77					52.7397
	letter sent 19%		27					18.4932
	pap pending 10%		15					10.274
	declined 3%		4					2.73973
	LVM 3%		4					2.73973
			146
	3rd review 6/6/21
	pcp 1%		2					1.35135
	OSC 3%		4					2.7027
	moved 1%		2					1.35135
	dnka/cxl 8%		12					8.10811
	already scheduled 1%		1					0.675676
	pap done 56%		82					55.4054	pap clinic
	letter sent 19%		27					18.2432
	pap pending 7%		10					6.75676
	declined 3%		4					2.7027
	LVM 3%		4					2.7027
			148
	4th review 6/29/21
	pcp 1%		2					1.35135
	OSC 3%		4					2.7027
	moved 1%		2					1.35135
	dnka/cxl 10%		14					9.45946
	already scheduled 1%		1					0.675676
	pap done 58%		86					58.1081
	letter sent 19%		28					18.9189
	pap pending 5%		7					4.72973
	declined 3%		4					2.7027
			148
	5th review 10/8/21
	pcp 1%		2					1.35135
	OSC 3%		5					3.37838
	moved 1%		2					1.35135
	dnka/cxl 10%		15					10.1351
	already scheduled 1%		0					0
	pap done 58%		92					62.1622
	letter sent 19%		28					18.9189
	pap pending 5%		0					0
	declined 3%		4					2.7027
			148
