# Supplementary material for: Electronic data review, client reminders, and expanded clinic hours for improving cervical cancer screening rates after the COVID-19 pandemic shutdowns: A multicomponent quality improvement program
Source: eLife. 2023 Aug 22;12:e85724. doi: 10.7554/eLife.85724 (PMC10471159; doi:10.7554/eLife.85724)
Supplement: Figure 6—source data 2. [file elife-85724-fig6-data2.xlsx]

## Sheet: Sheet1
Patient Number	Specialty Comments	Notes		2021-06-06	2021-06-29		pap	colpo	leep
152	pap overdue now 2	scheduled for 3/25	pap done				ascus	pap 1 yr
153	pap overdue now 2	rescheduled for 5/17	pap done				ascus hpv	pap 1 yr
154	pap overdue now 2	scheduled for 3/31	pap done				lsil	pap 1 yr
155	pap overdue now 2	scheduled for 3/31	pap done				nilm
156	pap overdue now 2	schrduled for 4/9	pap done				nilm
157	pap overdue now 2	scheduled 3/31	pap done				hpv	pap 1 yr
158	pap overdue now 2	scheduled 3/31	pap done				nilm
159	pap overdue now 2	rescheduled for 4/22	pap done				nilm
160	pap overdue now 2	rescheduled for 5/27	no show		dnka
161	pap overdue now 2	scheduled for 4/16	pap done				ascus hpv	pap 1 yr
162	pap overdue now 2	rescheduled for 5/25	no show	x
	6/29/21 update 3	pap done	9	pap clinic	1
		pending	0
		DNKA	3
	2021-10-17	pap done	9
		pending	0
		DNKA	3
