# Supplementary material for: Electronic data review, client reminders, and expanded clinic hours for improving cervical cancer screening rates after the COVID-19 pandemic shutdowns: A multicomponent quality improvement program
Source: eLife. 2023 Aug 22;12:e85724. doi: 10.7554/eLife.85724 (PMC10471159; doi:10.7554/eLife.85724)
Supplement: Figure 6—source data 3. [file elife-85724-fig6-data3.xlsx]

## Sheet: Sheet1
Patient Number	Specialty Comments		Notes		2021-06-06	2021-06-29	2021-10-08	pap	colpo	leep
163	pap overdue now 3		LEEP pt 2020 pap done	np cxl, no call
164	pap overdue now 3		scheduled for 5/18/21	pap done				nilm
165	pap overdue now 3		Pt TX TO TUFTS
166	pap overdue now 3		reschedule for 6/9/21	No show twice		dnka
167	pap overdue now 3		scheduled for 5/14/21	pap done				nilm
168	pap overdue now 3		2nd call letter sent
169	pap overdue now 3		Schedule for 5/24	pap done				nilm
170	pap overdue now 3		schedule 5/14/21	pap done				nilm
171	pap overdue now 3		schedule for 5/25/21	pap done	pap clinic			nilm
172	pap overdue now 3		rescheduled for 7/28/21	r/s from 5/23	no show	resched	cxl md
173	pap overdue now 3		scheduled for 5/14/21	np cxl, no call	xx
174	pap overdue now 3		scheduled for 5/18/21	pap done				nilm
175	pap overdue now 3		scheduled for 5/18/21	pap done
176	pap overdue now 3		reschedule for 6/9/21	pap done		dnka
177	pap overdue now 3		scheduled for 5/14/21	pap done				nilm
178	pap overdue now 3		scheduled for 5/18/21	pap done
179	pap overdue now 3		Schedule for 5/24	pap done				nilm
180	pap overdue now 3		schedule 5/14/21	pap done				nilm
181	pap overdue now 3		schedule for 5/25/21	pap done	pap clinic			nilm
182	pap overdue now 3		scheduled for 5/18/21	pap done	no show	resched	cxl md
183	pap overdue now 3		scheduled for 5/14/21	pap done	xx
184	pap overdue now 3		scheduled for 5/18/21	pap done				nilm
									6/6 update 2		cxl/dnka	1
											pap done	5	pap clinic	1
											pending	2
											OSC	1
											letter sent	1
												10
									6/29 update 3		cxl/dnka	2
											pap done	5
											pending	1
											OSC	1
											letter sent	1
												10
									10/8 update 4		cxl/dnka	3
											pap done	5
											pending	0
											OSC	1
											letter sent	1
												10
