# Supplementary material for: Electronic data review, client reminders, and expanded clinic hours for improving cervical cancer screening rates after the COVID-19 pandemic shutdowns: A multicomponent quality improvement program
Source: eLife. 2023 Aug 22;12:e85724. doi: 10.7554/eLife.85724 (PMC10471159; doi:10.7554/eLife.85724)
Supplement: Figure 6—source data 4. [file elife-85724-fig6-data4.xlsx]

## Sheet: Sheet1
Patient Number	Specialty Comments	Notes		2021-10-08		pap	colpo	leep
185	pap overdue now 4	schedule for 5/18 per pt request	pap was done			nilm
186	pap overdue now 4	pt will call back
187	pap overdue now 4	phone out of service letter sent
188	pap overdue now 4	scheduled for 3/23/21	pap done			nilm
189	pap overdue now 4	scheduled for 4/29/21, unsatisfactory	pap was done			insufficient	letter
190	pap overdue now 4	pt moved out the state
191	pap overdue now 4	scheduled for 3/23/21	pap done			nilm
192	pap overdue now 4	scheduled for 3/23/21	pap done			nilm
193	pap overdue now 4	SCheduled for 3/30/21	pap done			nilm
194	pap overdue now 4	rescheduled for 5/26	dnka callx 1 no show twice
195	pap overdue now 4	scheduled for 4/22/21	pt cxl/lvm letter sent
196	pap overdue now 4	pt is in DR willl call when is back
197	pap overdue now 4	schedule for 4/7/21	pap done			nilm
198	pap overdue now 4	rescheduled for 5/26	pap done			ascus	pap 1 yr
199	pap overdue now 4	pt will call when she has insurance
200	pap overdue now 4	2nd call letter sent
201	pap overdue now 4	Schedule for 3/25 with pcp for phisycal	pap done			hpv 16	neg
202	pap overdue now 4	scheduled 7/6/21	pap done	done		nilm
203	pap overdue now 4	scheduled 5/11/21	pt cxl/lvm letter sent
204	pap overdue now 4	SCheduled for 3/30/21	pt cxl/lvm letter sent
205	pap overdue now 4	Scheduled for 4/15/21	pap done			nilm
	REVIEW 1 + 6/6 #2+ 6/29 #3	pap done	10	pap clinic
		letter	4
		decline	3
		pending	1
		moved	1
		dnka/cxl	4
			23
	update 4 10/8	pap done	11
		letter	4
		decline	3
		pending	0
		moved	1
		dnka/cxl	4
			23
