# Supplementary material for: Electronic data review, client reminders, and expanded clinic hours for improving cervical cancer screening rates after the COVID-19 pandemic shutdowns: A multicomponent quality improvement program
Source: eLife. 2023 Aug 22;12:e85724. doi: 10.7554/eLife.85724 (PMC10471159; doi:10.7554/eLife.85724)
Supplement: Figure 7—source data 1. [file elife-85724-fig7-data1.xlsx]

## Sheet: 1-200
Patient Number	Pap Clinic Date	Calls	Letter	Notes	8/13 update	7/1 update	6/6 UPDATE
1	2021-07-22			Pt is already schedule for pap
2				pt declined for now
3	2021-07-27			R/s from 6/12		reschedule
4	2021-05-05			pap was Done
5	2021-04-19			pap was done
6				pt moved
7		2nd call on 4/19		pt states she will call back
8		2nd call on 4/23	letter sent	lvm and letter sent
9		2nd call on 4/23	letter sent	unable to lvm letter sent
10		2nd call on 4/23	letter sent	unable to lvm letter sent
11		2nd call on 4/23		Pt prefer her pcp message sent to pcp
12	2021-06-12			pap was done		done
13	2021-04-22			Pap done
14		2nd call on 4/23	lette sent	lvm letter sent
15	2021-05-19			pap was done			X
16		1st call on 4/19	letter sent	unable to lvm
17		1st call on 4/19	letter sent	unable to lvm
18				pt declined the pap
19	2021-06-15			no show		dnka
20		2nd call on 4/23	letter sent	lvm
21		2nd call on 4/23	HM updated	pt transfer her care to MGH Revere
22	2021-06-10			no show		dnka	X
23	2021-05-05			pap was Done
24	2021-06-12			no show		dnka	X
25	2021-07-07			no show to 5/19			X
26		2nd call on 4/26		pt will call back to schedule her pap
27			HM updated	pap was done 12/20 on Texas per pt
28	2021-06-12			pap was done		done	X
29		2nd call 4/26/21	letter sent	lvm letter sent
30		1st call on 4/20		pt states she will call back
31	2021-06-12			no show		dnka	X
32	2021-04-22			pap done
33	2021-05-21			pap done			x
34	2021-05-05	1st call	letter sent	no show
35	2021-05-05			pap was Done
36		2nd call on 4/26	letter sent	LVM letter sent
37		2nd call on 4/27	letter sent	lvm letter sent
38	2021-06-12		letter sent	NO show		dnka	X
39		2nd call on 4/27	letter sent	lvm letter sent
40	2021-06-12			no show		dnka	X
41	2021-05-19			pap was done			x
42	2021-06-08			pap was done		done	x
43				Pt prefer her pcp message sent to pcp
44	2021-06-07			pap was done		done
45	2021-06-12			pap was done		done	X
46	2021-05-05			pap was Done
47	2021-06-12			pap was done		done	X
48	2021-05-19	call to R/s pt will call back		No show 5/19			x
49		1st call	letter sent	unable to lvm
50	2021-06-26			pap was done		done	X
51	2021-07-07			pt ready scheduled for pap
52	2021-06-12			no show		dnka	X
53	2021-06-12			pap was done		done	X
54	2021-05-05			pap done			x
55		2nd call on 4/27/21	letter sent	lvm letter sent
56	2021-05-19			pap was done			x
57		2nd call 4/28/21		lvm/letter mailed 04/28/21
58	2021-06-12			no show		dnka	x
59	2021-06-12			pap was done		done	x
60		2nd call 4/28/21		lvm/letter mailed 04/28/21
61	2021-06-12			pap was done		done	x
62	2021-05-19			R/s from 5/5 dnka 5/19			x
63		04/21/21 spoke with pt	HM updated	Had pap at Medford Hcenter/2Years ago
64		2nd call	letter sent	lvm
65			no proof of pap	03/2021 pap done MGH Chelsea ER
66	2021-06-12			no show		dnka	x
67		2ND Call 4/28/21		moved to NH
68	2021-06-26			pt cancelled		cxl	x
69		1ST CALL 04/21/21	letter sent	Mailbox full/letter mailed 04/21/21
70		2nd call 04/28/2021		declines/not scheduling at this time
71	2021-05-05			Hyst not documented in chart: HM corrected
72	2021-05-05	call to r/s	letter sent	pt canceled
73		2nd call 04/27/21	letter sent	lvm/letter mailed 04/27/21
74		1st call 4/21/21	letter sent	Mailbox full/letter mailed 04/22/21
75	2021-05-25	pt cancelled twice		cancelled 5/5 and 5/25			x
76	2021-05-05	call to r/s	letter sent	no show
77	2021-06-30			Pt no show have appt on 5/25 with Dani		cxl	x
78		2ND CALL 04/27/21	letter sent	Letter mailed 04/27/21
79	2021-05-05			pap was done
80		2nd CALL 04/27/21	letter sent	lvm/letter mailed 04/27/21
81		had pap at TUFTS	HM updated	Pap @TUFTs is up to date
82	2021-05-05			pap was done
83		2nd CALL 04/27/21	letter sent	lvm/letter mailed 04/27/21
84		2nd CALL 04/22/21	letter sent	lvm/letter mailed 04/27/21
85	2021-05-05			pap was done
86	2021-05-05			pap was done
87	2021-05-05			pap was done
88	2021-07-21	no show 6/8		Scheduled for Repap with PamSchuster			x
89		2nd CALL 04/27/21	letter sent	lvm/letter mailed 04/27/21
90		1st call 4/22/21		pt declines /It hurts when she had last one
91	2021-04-23			pap was done
92	2021-05-05	call to r/s	letter sent	pt cancelled			x
93		2nd call 4/27/21	letter sent	lvm/letter mailed 04/27/21
94		1st call 4/27/21	requested PCP	Prefers pap with PCP-Adult medicine
95	2021-05-05			pt cancelled no ins
96	2021-06-12	call R/s to 6/12		pt declined pap		declined	x
97		2nd CALL 04/27/21		pt to schedule this appt. later /declined
98		2ND CALL 04/27/21		Declines-wants Thursday only
99		2nd call 4/27/21	letter sent	lvm/letter mailed 04/27/21
100		2ND call 4/27/21	letter sent	lvm/letter mailed 04/27/21
101	2021-06-26			pap was done		done	x
102		2nd call 4/26/21	letter sent	lvm/letter mailed 04/27/21
103	2021-06-12			pap was done			x
104	2021-05-05			pap was done		done
105		2nd call 4/27/21	letter sent	lvm/letter mailed 04/27/21
106		2nd call on 4/26/21	HM updated	pap was done 3 wks ago outside ebnhc
107		1st call 4/26/21		pt states will call back
108		1st call 4/26/21	letter sent	unable to lvm
109		2nd call 04/27/21	letter sent	lvm/letter mailed 04/27/21
110		1st call 04/26/21	letter sent	unable to lvm
111		1st call 4/26/21	letter sent	unable to lvm
112		1st call 4/26/21	letter sent	unable to lvm
113				pt states she will call back ins issue
114		1st call 4/26/21	letter sent	unble to lvm
115	2021-05-05			pap was done
116		1st call 4/26/21		declined due to other medical problems needs to take care 1st
117				pt declined pap
118		1st call 4/26/21	letter sent	unable to lvm
119	2021-05-25			pap was done			x
120		2nd call 4/28/21	letter sent	lvm/letter sent 4/28/21
121		2nd call 4/28/21	letter sent	lvm/letter sent 4/28/21
122	2021-06-12			pap was done		done	x
123	2021-05-05			pap was done
124	2021-05-05			pap was done
125	2021-05-12			pap was done			x
126	2021-05-19	No show to 5/19	letter sent	5/19/21dnka			x
127	2021-05-19			pap was Done			x
128	2021-05-05			pap was done
129	2021-05-05			pap was done
130		2nd call on 4/27/21		pt will call back to schedule her pap
131		2nd call on 4/28/21	letter sent	lvm/letter sent 4/28/21
132	2021-05-19	call to R/s	letter sent	No show to 5/19
133				pt prefre pap to be done by pcp
134				pt declined to schedule a pap
135	2021-07-07	call pt R/s to 5/11/21		no show to 5/5			x
136			Transferred	pap was done outside EBNHC
137	2021-05-05			pap was done
138	2021-05-05			pap was done
139		2nd call 4/29/21	letter sent	lvm/letter sent 4/28/21
140	2021-06-12	call r/s to 6/12		no show to 5/5 and 6/12		dnka	x
141		2nd call on 4/29/21		pt prefer her pcp message sent to pcp
142	2021-05-19			Pap was done			x
143		1st call 4/28/21	letter sent	unable to lvm
144
145	2021-05-05			pap was done
146	2021-05-05	call to r/s	letter sent	pt cancelled
147	2021-06-26	call r/s to 6/26		pap was done		done	x
148				pt had pap done outside EBNHC
149		2nd call 4/29/21	letter sent	lvm/letter sent 4/28/21
150	2021-06-12			no show		dnka	x
151	2021-06-12			no show		dnka	x
152		1st call 4/28/21	letter sent	unable to lvm
153		2nd call 4/29/21	letter sent	lvm/letter sent 4/28/21
154		1st call 4/28/21		pt will call back to schedule her pap
155		2nd call on 4/28/21		pt will call back to schedule her pap
156		1st call on 4/27/21	letter sent	unable to lvm
157	2021-06-12			pap was done		done	x
158	2021-05-05	call to r/s	letter sent	no show
159		2nd calll on 4/28/21	letter sent	lvm/letter mailed 04/28/21
160	2021-06-12			pap was done		done	x
161		1st calll on 4/27/21	letter sent	wrong telephone number letter sent
162		2nd call 4/28/21		Prefers pap with PCP-Adult medicine
163		2nd call 4/28/21	HM updated	Pt scheduled @ MGH Revere 05/08/2021
164		2nd call 4/28/21	letter sent	lvm/letter mailed 04/28/21
165		2nd call 4/28/21	HM updated	Had Pap @ MGH Boston, 03/2021
166	2021-06-12			no show		dnka	x
167		2nd call 4/28/21	letter sent	lvm/letter mailed 04/28/21
168	2021-06-12			no show		dnka	x
169	2021-05-05			pap was done
170		2nd call on 4/28/21		pt declined she only wants M-W from 11 amto 1pm
171	2021-05-25			pap was done			x
172	2021-06-26			pap was Done		done	x
173		1st call on 4/22/2021		pt prefer her pcp message sent to pcp
174	2021-05-25			pap was done			x
175		1st call on 4/22/2021	letter sent	wrong telephone number letter sent
176	2021-05-25	No show twice		no show 5/5 and 5/25			x
177		2nd call on 4/28/21	HM updated	Steward Medical for gyn
178		2nd call on 4/28/21	HM updated	gyn in Revere
179	2021-06-26			pap was done		done	x
180	2021-05-05			pap was done
181		2nd call on 4/28/21	letter sent	lvm/letter sent 4/28/21
182	2021-06-26			pap was done		done	x
183	2021-07-02			pt has ipv at OB/GYN on 7/2/21
184	2021-05-05	call to r/s	letter sent	pt cancelled
185	2021-05-05	call to r/s	letter sent	pt cancelled
186		call to pt	letter sent	lvm/letter sent 4/28/21
187		2nd call on 4/28/21	letter sent	lvm/letter sent 4/28/21
188		2nd call on 4/28/21	letter sent	lvm/letter sent 4/28/21
189	2021-06-12			pap was done		done	x
190	2021-05-05			pap was done
191	2021-06-12			no show		dnka	x
192	2021-06-12			no show		dnka	x
193			HM updated	pap at MGH Revere
194	2021-06-26			pap was done		done	x
195	2021-06-12			no show		dnka	x
196		2nd call on 4/28/21	letter sent	lvm/letter sent 4/28/21
197		2nd call on 4/28/21	letter sent	lvm/letter sent 4/28/21
198		1st call on 4/21/21		pt decline due to no insurance
199		2nd call on 4/28/21	letter sent	lvm/letter sent 4/28/21
		pcp		7
		OSC		13
		moved		2
		dnka/cxl		14
		already scheduled		10
		pap done		25
		letter sent		58
		pap clinic pending		48
		decline		20
				197
	2021-06-06	pcp		7
		OSC		13
		moved		2
		dnka/cxl		15
		already scheduled		6
		pap done		36
		letter sent		58
		pap clinic pending		38
		decline		20
		LVM		0
		pap pending		4
				199
	2021-07-01	pcp		7
		OSC		13
		moved		2
		dnka/cxl		34
		already scheduled		0			in pending
		pap done		57
		letter sent		58
		pap clinic pending		0
		decline		21
		pap pending		7
				199
