# Supplementary material for: Electronic data review, client reminders, and expanded clinic hours for improving cervical cancer screening rates after the COVID-19 pandemic shutdowns: A multicomponent quality improvement program
Source: eLife. 2023 Aug 22;12:e85724. doi: 10.7554/eLife.85724 (PMC10471159; doi:10.7554/eLife.85724)
Supplement: Figure 7—source data 2. [file elife-85724-fig7-data2.xlsx]

## Sheet: 201-300
Patient Number	Pap Clinic Date	Calls	Letter	Notes	2021-06-06	2021-07-02
200	2021-05-18	call to r/s	letter sent	no show to 5/18	x
201		2nd call	letter sent	lvm/letter sent
202		2nd call	letter sent	lvm/letter sent
203				pt cancelled pap was done last year at Beth Israel	x
204		1st call 4/28		pt will call back
205		1st call 4/29		pt states she will call back
206		2nd call	letter sent	lvm/letter sent
207		2nd call	letter sent	lvm/letter sent
208	2021-06-12			pap was done	x	done
209	2021-07-09				x
210				pt declined to schedule an appt.
211		2nd call		pt will call back to schedule
212		2nd call	letter sent	lvm/letter sent
213	2021-05-19			pap was done	x
214	2021-05-19			pap was done	x
215		2nd call	letter sent	unable to lvm
216	2021-05-19	no show	letter sent	no show to 5/19	x
217				pt declined to have a pap
218		2nd call	letter sent	lvm/letter sent
219	2021-06-12			no show	x	dnka
220	2021-05-07			pap done		done
221	2021-05-19	call r/s to 5/19/21		no show 5/5 and 5/19 letter sent	x
222	2021-05-17			pap was done	x
223		1st call 4/29	letter sent	unable to lvm
224		2nd call	letter sent	lvm/letter sent
225		2nd call		pt declined to speak
226				pt declined to have a pap
227		1st call	letter sent	lvm/letter sent
228		1st call	letter sent	lvm/letter sent
229				pt moved
230		1st call	letter sent	lvm/letter sent
231		1st call	letter sent	lvm/letter sent
232				pt prefer pap done with Pcp message sent.	x
233	2021-06-17			no show	x	dnka
234	2021-06-26			pt cancelled	x	cxl
235	2021-06-07			Pap was done		done
236		1st call		pt will call back
237	2021-07-10			pt r/s 6/26	x	pend still
238	2021-05-19			pap was done	x
239	2021-06-15			no show		dnka
240	2021-05-19			pap was done	x
241		1st call	letter sent	lvm/letter sent
242	2021-07-08				x
243	2021-06-12			pap was done	x	done
244	2021-06-12			pap was done	x	done
245				pt will call to schedule
246		1st call	letter sent	letter sent
247		1st call	letter sent	letter sent
248				pt done else where
249	2021-05-25	cancelled appt		cxl
250		1st call 4/30	letter sent	pap done 6/2	x
251	2021-06-12			pap done	x	done
252				pt will call back to schedule
253		1st call 4/30	letter sent	lvm/letter sent
254				pap done at BI
255		1st call 4/30	letter sent	lvm/letter sent
256		1st call 4/30	letter sent	lvm/letter sent
257				pt moved out of states
258		1st call 4/30	letter sent	lvm/letter sent
259	2021-05-05	call to r/s	letter sent	no show
260	2025-05-25			pap done	x
261				pt prefer pap done with Pcp message sent.
262				pt prefer pap done with Pcp message sent.
263				pt prefer pap done with Pcp message sent.
264			HM updated	pap done at MGH
265	2021-06-26			pt cancelled	x	cxl
266	2021-06-26			pt cancelled	x	cxl
267		2nd call	letter sent	lvm/letter sent
268	2021-06-12			pap was done	x	done
269				pt moved to PA
270				pt canceled and request pcp message sent	x
271	2021-07-06	R/s from 6/26/21		No show to 5/19
272			HM updated	pap done at MIT MED ON 2019
273	2021-06-26	pt cancelled		cancelled	x	cxl
274	2021-06-21			pap was done		done
275	2021-06-26	pt R/s		No show 5/19 and 6/26	x	dnka
276		2nd call	letter sent	unable to lvm
277		2nd call	letter sent	lvm/letter sent
278	2021-06-26			pt cancelled		cxl
279	2021-04-27			pap done
280	2021-05-11			pap was Done with PCP
281		2nd call	letter sent	lvm/letter sent
282	2021-05-19	No insurance		pt cancelled due to no insurance	x
283	2021-05-19			pap was done	x
284	2021-06-12			no show		dnka
285				pt declined to have a pap
286	2021-06-12			pap was done	x	done
287	2021-05-19			pap was done	x
288	2021-06-26	pt cancelled		pt cancelled 5/19 and R/S to 6/26 and no show	x	dnka
289		2st call 4/29	letter sent	lvm/letter sent
290	2021-05-19	call to r/s	letter sent	no show to 5/19	x
291		2nd call	letter sent	lvm/letter sent
292	2021-06-12			no show	x	dnka
293	2021-06-12			pap was done	x	done
294	2021-05-19			pap was done	x
295		2nd call		Pt is admitted at hospital		decline
296	2021-06-12			pap was done		done
297	2021-05-26		call x 1	dnka
298				pt states she will call back
299		1st call	letter sent	lvm/letter sent
	pcp		4
	OSC		4
	moved		3
	dnka/cxl		2
	already scheduled		7
	pap done		1
	letter sent		30
	pap clinic pending		38
	decline		9
			98
	pcp		5
	OSC		4
	moved		3
	dnka/cxl		7
	already scheduled		7
	pap done		11
	letter sent		28
	pap clinic pending		19
	decline		12
	pap pending		4
			100
	pcp		5
	OSC		4
	moved		3
	dnka/cxl		23
	pap done		23
	letter sent		27
	pap clinic pending		1
	decline		11
	pap pending		3
			100
