# Supplementary material for: Electronic data review, client reminders, and expanded clinic hours for improving cervical cancer screening rates after the COVID-19 pandemic shutdowns: A multicomponent quality improvement program
Source: eLife. 2023 Aug 22;12:e85724. doi: 10.7554/eLife.85724 (PMC10471159; doi:10.7554/eLife.85724)
Supplement: Figure 7—source data 3. [file elife-85724-fig7-data3.xlsx]

## Sheet: Sheet1
Patient Number	Pap Clinic Date	Calls	Letter	Notes	2021-06-06	2021-07-02
300		1st call on 4/30/21		pt xfer to watertown
301	2021-05-25	no show		no show
302	2021-06-12			pap was done	x	done
303				Pt declined pap due to no insurance.
304		1st call on 4/30/21		lvm /letter sent	letter?	letter
305				Pt Declined to have a pap.
306		1st call on 4/30/21		Pt will call back to schedule her pap.
307		1st call on 4/30/21		lvm /letter sent	letter?	letter
308		1st call on 4/30/21		lvm /letter sent	letter?	letter
309		1st call on 4/30/21	letter sent	lvm/letter sent
310	2021-05-05			pap was done with pcp
311	2021-05-19			pap was done	x
312	2021-05-19			pap was done	x
313			HM updated	pap was done outside Ebhnc on 11/2020
314		1st call on 4/30/21	letter sent	lvm/letter sent
315		1st call on 4/30/21	letter sent	phone not working
316				call pt back next week
317		1st call on 4/30/31	letter sent	lvm/letter sent
318	2021-06-26	pt cancelled R/s		pt cancelled an r/s to 6/26 no show	x	dnka
319	2021-05-25			pap was done	x
320	2021-05-19			pap was done	x
321		1st call on 4/30/21	letter sent	lvm/letter sent
322	2021-05-19			pap was done	x
323	2021-08-05	R/s from 6/24		pt already scheduled		pend
324		1st call on 4/30/21	letter sent	lvm/letter sent
325		1st call on 4/30/21	letter sent	lvm/letter sent
326	2021-05-19			pap was Done	x
327		1st call on 4/30/21	letter sent	lvm/letter sent
328		1st call on 4/30/21	letter sent	unable tp lvm
329		1st call on 4/30/21	letter sent	phone not working
330	2021-06-26	1st call on 4/30/21	letter sent	no show	x	dnka
331	2021-05-19			pap was done	x
332				Pt Declined to have a pap.
333	2021-06-26			pap was done	x	done
334				Pt Declined to have a pap.
335				Pt Declined to have a pap.
336	2021-05-19			pap was done	x
337		1st call	letter sent	lvm/letter sent
338				Pt will call when her insurance is active
339	2021-05-25			pap was done	x
340	2021-05-19			pap was done	x
341	2021-04-19			pap was done
342		1st call	letter sent	lvm/letter sent
343				Pap done at Melrose 04/2021
344		1st call	letter sent	lvm/letter sent
345	2021-06-26	R/s		no show to 5/19 and 6/26	x	dnka
346				Pt will call back to schedule her pap.
347	2021-04-27			pap was done
348	2021-06-26			no show	x	dnka
349		1st call	letter sent	lvm/letter sent
350		1st call	letter sent	lvm/letter sent
351		1st call	letter sent	lvm/letter sent
352		1st call	letter sent	unable to lvm
353		1st call	letter sent	lvm/letter sent
354	2021-06-12			pap was done	x	done
355		1st call	letter sent	unable to lvm/phone rings then goes busy
356		1st call		MGH Revere pap 4/30/2021
357				pap done done during pregnancy		call pt
358	2021-06-12			no show	x	dnka
359	2021-05-25			pap was done	x
360		1st call	letter sent	lvm/letter sent
361		1st call	letter sent	lvm/letter sent
362	2021-07-28			pt cancelled from 6/12 and R/s to 7/28	x	pend
363	2021-06-12	R/S		pap was done	x	done
364	2021-05-13			sab, dnka	x
365		1st call		pt declined transfering service to another clinic
366		1st call		pt declined due to no insurance/pt will call back to sch.
367		1st call	letter sent	lvm/letter sent
368	2021-06-12			no show	x	dnka
369	2021-06-12			no show	x	dnka
370		1st call	letter sent	lvm/letter sent
371		1st call	letter sent	unable to lvm letter sent
372		1st call	letter sent	lvm /letter sent
373		1st call	letter sent	lvm/letter sent
374		1st call	letter sent	lvm/letter sent
375	2021-05-04			pap was Done with pcp
376	2021-06-01			pt cancelled	x
377				Pt will call back to schedule her pap.
378	2021-05-19			Pap was done	x
379	2021-06-18			pap done	x	done
380				pt declined to schedule her pap
381		1st call		unable to sent a letter pt has a confidential number
382		1st call	letter sent	lvm/letter sent
383	2021-05-25			pap was done	x
384		1st call	letter sent	lvm/letter sent
385		1st call	letter sent	lvm/letter sent
386	2021-06-26			pap was done	x	done
387	2021-05-19	pt cancelled	letter sent	letter sent	x
388		1st call	letter sent	lvm/letter sent
389	2021-04-19			pap was done
390		1st call	letter sent	lvm/letter sent
391	2021-05-25			pap was done	x
392	2021-05-19			pap was done	x
393	2021-05-05			pap was done
394	2021-04-20			pap was done
395		1st call	letter sent	lvm/letter sent
396		1st call		Pt will call back to schedule her pap.
397	2021-05-25			pap was done	x
398	2021-06-12			Pap was done	x	done
399	2021-06-08			Pap was done		done
400		1st call		pt declined
401		1st call	letter sent	lvm/letter sent
402	2021-06-12	1st call	letter sent	pap was done	x	done
403	2021-06-12			pap was done	x	done
404		1st call	letter sent	lvm/letter sent
405		1st call	letter sent	unable to lvm
406				care partner declined pap
407	2021-05-25			dnka	x
408		1st call	letter sent	lvm/letter sent
409		1st call		lvm /letter sent	letter?	letter
410	2021-06-12			pap was done	x	done
411		1st call	letter sent	lvm/letter sent
412	2021-06-26	R/s for 6/12		pap was done	x	done
413				will call after fix her ins issue
414		1st call	letter sent	lvm/letter sent
415		1st call	letter sent	lvm/letter sent
416	2021-06-17			pap was done	x	done
417		1st call	letter sent	lvm /letter sent
418		1st call	letter sent	lvm/letter sent
419	2021-05-25			no show
420		1st call	letter sent	lvm/letter sent
421	2021-05-07			pap done
422		1st call	letter sent	lvm/letter sent
423		1st call	letter sent	unable to lvm
424	2021-06-12			pap was done	x	done
425		1st call	letter sent	lvm /letter sent	Letter?	letter
426		1st call	letter sent	lvm/letter sent
427	2021-06-12			pap was done	x	done
428		1st call	letter sent	lvm/letter sent
429				has no idea what a pap is/mess sent to PCP
430		1st call	letter sent	lvm/letter sent
431				Pt is moving to another state
432		1st call	letter sent	lvm/letter sent
433	2021-07-30	1st call	letter sent	appt w Dr. Perkins	x
434			letter sent	LVM/letter sent
435		1st call	letter sent	lvm/letter sent
436		1st call	letter sent	lvm/letter sent
437		1st call	letter sent	lvm/letter sent
438		1st call	letter sent	lvm/letter sent
439	2021-05-05			pap was done
440				pt will call back to schedule her pap.
441		1st call	letter sent	lvm /letter sent
442		pt called back	letter sent	unable to lvm has no insurance
443	2021-06-26	R/s from 6/12		pap was done	x	done
444	2021-06-12			pt cancelled	x	cxl
445		1st call	letter sent	lvm/letter sent
446	2021-07-27			R/s from 6/12/21	x	pend
447		1st call	letter sent	lvm /letter sent
448		1st call	letter sent	lvm/letter sent
449		1st call	letter sent	unable to lvm
450		1st call	letter sent	lvm /letter sent
451		1st call	letter sent	lvm/letter sent
452	2021-05-07			pap done
453	2021-06-24			pap was done		done
454	2021-07-13		letter sent	lvm/letter sent
455	2021-05-12			pap done	x
456		1s call	letter sent	lvm/letter sent
457	2021-06-24			pap was done		done
458		1st call	letter sent	lvm/letter sent
459	2021-06-12		letter sent	pap was done	x	done
460		1st call	letter sent	lvm/letter sent
461		1st call		pt will call back to schedule her pap.
462		1st call	letter sent	lvm
463		1st call	letetr sent	letter sent
464	2021-04-26			pap was doen with pcp	x	done
465	2021-06-12			no show	x	dnka
466	2021-06-12		letter sent	pap was Done	x	done
467		1st call	letter sent	lvm
468		1st call	letter sent	lvm
469	2021-06-12			pap was done	x	done
470		1st call	letter sent	letter sent
471	2021-05-12			pap was done with pcp
472		1st call	letter sent	lvm
473		1st call	letter sent	lvm
474				pt declined
475		1st call	letter sent	pt has no ins
476		1st call	letter sent	lvm
477		1st call	letter sent	lvm
478				pt declined
479	2021-06-08			pt cancelled		cxl
480	2021-06-26			pt cancelled	x	cxl
481		1st call	letter sent	unable to lvm letter sent
482		1st call	letter sent	lvm/letter sent
483	2021-05-05			pap was done
484		1st call	letter sent	lvm/letter sent
485		1st call	letter sent	lvm/letter sent
486		1st call	letter sent	lvm/letter sent
487	2021-06-22			pap was done	x	done
488	2021-06-12			pap was done	x	done
489		1st call	letter sent	lvm/letter sent
490				pt declined
491		1st call	letter sent	lvm/letter sent
492		1st call	letter sent	lvm/letter sent
493	2021-05-25			pap was done	x
494			letter sent	pt request pap to be done by pcp message sent
495	2021-05-04			pap was done
496	2021-05-05			pap was done
497		1st call	letter sent	lvm/letter sent
498	2021-06-12			no show	x	dnka
499		1st call	letter sent	lvm/letter sent
	pcp		1
	OSC		2
	moved		1
	dnka/cxl
	already scheduled		10
	pap done		13
	letter sent		95
	pap clinic pending		48
	decline		19
	LVM		6
			195
6/7 review	pcp		1	x
	OSC		3	x
	moved		1	x
	dnka/cxl		6	x
	already scheduled		4	x
	pap done		32	x
	letter sent		85	10 scheduled
	pap clinic pending		32	x
	decline		21	x
	LVM		5	x
	pap pending		8	x
			198
2021-05-01	1-200	201-300	301-500
	7	4	1	12			pcp 3%		12	0.0247934
	13	4	2	19			OSC 4%		19	0.0392562
	2	3	1	6			moved 1%		6	0.0123967
	14	2		16			dnka/cxl 3%		16	0.0330579
	10	7	10	27			already scheduled 6%		27	0.0557851
	25	1	13	39			pap done 8%		39	0.0805785
	58	30	95	183			letter sent 38%		183	0.378099
	48	38	48	134			pap clinic pending 28%		134	0.27686
	20	9	19	48			decline 10%		48	0.0991736
	197	98	189	484
				6
2021-07-02	pcp		1
	OSC		3
	moved		1
	dnka/cxl		14
	already scheduled		1
	pap done		58
	letter sent		93
	pap clinic pending		0
	decline		21
	pap pending		5
			197
