# Supplementary material for: Electronic data review, client reminders, and expanded clinic hours for improving cervical cancer screening rates after the COVID-19 pandemic shutdowns: A multicomponent quality improvement program
Source: eLife. 2023 Aug 22;12:e85724. doi: 10.7554/eLife.85724 (PMC10471159; doi:10.7554/eLife.85724)
Supplement: Figure 7—source data 4. [file elife-85724-fig7-data4.xlsx]

## Sheet: 501-601
Patient Number	Pap Clinic Date	Calls	Letter	Notes	2021-06-06	2021-07-02
500				being seen at BI Chelsea
501	2021-07-12	pt R/s		cancelled 5/19
502		1st call		confidential
503	2021-05-25		no show with pcp	DNKA
504		1st call	letter sent	letter sent phone disconnected
505		1st call	letter sent	lvm/letter sent
506		1st call	letter sent	lvm/letter sent
507		1st call	letter sent	lvm/letter sent
508		1st call	letter sent	lvm/letter sent
509		1st call	letter sent	lvm/letter sent
510		1st call	letter sent	lvm/letter sent
511		1st call	letter sent	lvm/letter sent
512		1st call	letter sent	lvm/letter sent
513		1st call	letter sent	lvm/letter sent
514		1st call	letter sent	lvm/letter sent
515		1st call	letter sent	lvm/letter sent
516		1st call	letter sent	lvm/letter sent
517		1st call	letter sent	lvm/letter sent
518		1st call	letter sent	lvm/letter sent
519		1st call	letter sent	lvm/letter sent
520		1st call	letter sent	lvm/letter sent
521		1st call	letter sent	lvm/letter sent
522		1st call	letter sent	lvm/letter sent
523		1st acll	letter sent	lvm/letter sent
524		1st call	letter sent	lvm/letter sent
525		1st call	letter sent	lvm/letter sent
526		1st call	letter sent	lvm/letter sent
527		1st call	letter sent	lvm/letter sent
528		1st call	letter sent	lvm/letter sent
529		1st call	letter sent	lvm/letter sent
530		1st call	letter sent	lvm/letter sent
531		1st call	letter sent	lvm/letter sent
532		1st call	letter sent	lvm/letter sent
533		1st call	letter sent	lvm/letter sent
534		1st call	letter sent	lvm/letter sent
535		1st call	letter sent	lvm/letter sent
536		1st call	letter sent	lvm/letter sent
537		1st call	letter sent	lvm/letter sent
538		1st call	letter sent	lvm/letter sent
539		1st call	letter sent	lvm/letter sent
540		1st call	letter sent	lvm/letter sent
541			letter sent	lvm/letter sent
542			letter sent	lvm/letter sent
543			letter sent	lvm/letter sent
544		1st call	letter sent	lvm/letter sent
545		1st call		lvm/unable to send a letter confidential
546	2021-06-26			no show		dnka
547	2021-06-26			no show		dnka
548	2021-06-26			no show 6/26		dnka
549	2021-06-26	R/s to 6/26/21		no show to 5/19/21 and 6/26		dnka
550	2021-05-19	no show 5/19	no show with pcp	no TE on Epic
551	2021-06-30			pap done		done
552	2021-06-26			pap was done		done
553	2021-05-19			pap was done
554	2021-05-19			pap was done
555	2021-06-26			pap was done		done
556	2021-05-07			pap was done
557	2021-04-22			pap was done
558	2021-05-19			pap was done
559	2021-06-12			pap was done		done
560	2021-05-19			pap was done
561	5/7/2021			pap was done
562	2021-05-19			pap was done
563	2021-06-26			pap was done		done
564	2021-06-12			pap was done		done
565	2021-06-26			pap was done		done
566	2021-06-26			pap was done		done
567	2021-06-26			pap was done		done
568	2021-06-26			pap was done		done
569	2021-05-06			pap was done		done
570	2021-05-26			pap was done		done
571	2021-06-26			pap was done		done
572	2021-04-28			pap was done		done
573	2021-05-04			pap was done		done
574	2021-05-04			pap was done		done
575	2021-05-11			pap was done		done
576				phone disconnected letter sent
577	2021-07-07			Pt already scheduled
578	2021-07-12			pt already scheduled E9
579	2021-06-26			pt Cancelled		cxl
580				pt declined pap
581				pt declined pap.
582				pt has no insurance
583	2021-06-26	no show 5/19		pt R/s to 6/26/21 pt cancelled		cxl
584	2021-07-28			pt scheduled at ob
585				pt tranferred (Fenway Health)
586		1st call		pt will call back
587				pt will call back
588	2021-07-23			scheduled at ob
589	2021-07-30			scheduled at ob
590	2021-07-27			scheduled at ob
591	2021-08-04			scheduled at ob
592		1st call		sent letter phone disconnected
593		1st call	letter sent	sent letter wrong number
594				sent to AM SECRETARY pol
595				sent to AM SECRETARY pool.
596				sent to AM SECRETARY pool.
597				sent to fmclerical pool
598				sent to fmclerical pool
599		1st call	letter sent	unable to lvm
600	2021-07-12
	pcp		0
	OSC		0
	moved		0
	dnka/cxl		2
	already scheduled		2
	pap done		7
	letter sent		5
	pap clinic pending		4
	decline		0
	pap pending		1
			21
		2021-06-07	2021-05-09
	pcp	13	12
	OSC	20	19
	moved	6	6
	dnka/cxl	30	16
	already scheduled	19	27
	pap done	86	39
	letter sent	176	183
	pap clinic pending	93	134
	decline	53	48
	LVM	5	0
	pap pending	17	na
		%	%
	pcp	0.03	0.03
	OSC	0.04	0.04
	moved	0.01	0.01
	dnka/cxl	0.06	0.03
	already scheduled	0.04	0.06
	pap done	0.17	0.08
	letter sent	0.34	0.38
	pap clinic pending	0.18	0.28
	decline	0.1	0.1
	LVM	0.01	0
	pap pending	0.03	na
	pcp		5
	OSC		2
	moved		0
	dnka/cxl		8
	pap done		25
	letter sent		45
	pap clinic pending		0
	decline		5
	pap pending		9
	confidential		2
			101
	7	5	1	0		13
	2	3	1	0		6
	13	4	3	0		20
	6	7	4	2		19
	0	0	5	0		5
	15	7	6	2		30
	4	4	8	1		17
	20	12	21	0		53
	36	11	32	7		86
	38	19	32	4		93
	58	28	85	5		176
	199	100	198	21		518
	1-200	201-300	301-500	501-600		all
