# Supplementary material for: Electronic data review, client reminders, and expanded clinic hours for improving cervical cancer screening rates after the COVID-19 pandemic shutdowns: A multicomponent quality improvement program
Source: eLife. 2023 Aug 22;12:e85724. doi: 10.7554/eLife.85724 (PMC10471159; doi:10.7554/eLife.85724)
Supplement: Figure 7—source data 5. [file elife-85724-fig7-data5.xlsx]

## Sheet: 602-702
Patient Number	Pap Clinic Date	Calls	Letter	Notes	2021-07-02
601	2021-06-26			no show	dnka
602
603	2021-07-23			pt requested Friday
604				Message sent to pcp
605	2021-07-14	R/s from 6/26
606	2021-07-06
607	2021-05-21			pap was done with pcp
608		1st call	letter sent	lvm/letter sent
609		1st call	letter sent	lvm/letter sent
610	2021-04-30			pap was done with Dr Dani
611	2021-07-06
612		1st call	letter sent	lvm/letter sent
613		1st call	letter sent	unable to lvm
614		1st call	letter sent	unable to lvm
615	2021-07-10	R/s from 6/26
616	2021-06-23			pap was done with pcp
617	2021-07-06
618	2021-08-10
619		1st call	letter sent	lvm/letter sent
620		1st call	letter sent	lvm/letter sent
621	2021-07-06			ready schedule with PCP
622		1st call	letter sent	lvm/letter sent
623	2021-05-11			pap was done
624	2021-07-06
625	2021-06-04			pap was done with pcp
626		1st call	confidential	unable to lvm or send a letter
627		1st call	letter sent	lvm/letter sent
628		1st call	confidential	lvm/letter sent
629		1st call	letter sent	unable to lvm
630	2021-05-14			pap was done with PCP
631	2021-07-06
632		1st call	confidential	lvm/unable to send letter
633	2021-06-26			no show	dnka
634	2021-07-02			ready schedule with PCP
635	2021-08-02
636	2021-07-29			ready schedule with Fessler
637		1st call	letter sent	lvm/letter sent
638	2021-05-10			pap was done
639	2021-07-28			ready schedule Dr Mazul
640		1st call	letter sent	lvm/letter sent
641		1st call	letter sent	lvm/letter sent
642		1st call	letter sent	lvm/letter sent
643		1st call	letter sent	lvm/letter sent
644		1st call	letter sent	lvm/letter sent
645		1st call	letter sent	lvm/letter sent
646		1st call	letter sent	lvm/letter sent
647		1st call	letter sent	lvm/letter sent
648		1st call	letter sent	lvm/letter sent
649		1st call	letter sent	lvm/letter sent
650		1st call	letter sent	lvm/letter sent
651	2021-06-10			pap was done
652	2021-07-02			ready schedule with pcp
653	2021-06-26			no show
654	2021-06-26			pap was done
655	2021-06-26			pap was done
656		1st call	letter sent	lvm/letter sent
657	2021-08-17			ready schedule with dani
658		1st call	letter sent	lvm/letter sent
659	2021-08-06			ready schedule with dani
660		1st call	letter sent	lvm/letter sent
661	2021-05-26			pap was done
662		1st call	confidential	lvm/unable to send letter
663		1st call	letter sent	phone not working
664	2021-07-07			ready schedule with PCP	nilm
665		1st call	confidential	lvm/unable to send letter
666	2021-07-06
667		1st call	letter sent	letter sent
668	2021-06-26			pap was done
669	2021-06-26			no show
670	2021-06-26			pt cancelled
671		1st acll	letter sent	letter sent
672	2021-07-06
673	2021-05-03			pap was Done
674				message sent to pcp
675
676		1st call	letter sent	lvm/letter sent
677		1st call	letter sent	lvm/letter sent
678			letter sent	lvm/letter sent
679				pt will call back
680	2021-07-14
681		1st call	letter sent	lvm/letter sent
682		1st call	letter sent	unable to lvm/letter sent
683	2021-06-28			pap done
684				pap was done BI Chelsea
685	2021-06-26			pap was done
686		1st call	letter sent	lvm/letter sent
687		1st call	confidential	phone not working
688	2021-08-03
689		1st call	letter sent	lvm/letter sent
690	2021-07-06
691		1st call	letter sent	lvm/letter sent
692		1st call	letter sent	lvm/letter sent
693		1st call	letter sent	lvm/letter sent
694	2021-07-06
695				pt will call back no insurance
696	2021-07-01			pap done
697		1st call	letter sent	lvm/letter sent
698		1st call	letter sent	lvm/letter sent
699		1st call	letter sent	lvm/letter sent
			2021-07-02	pcp		2
				OSC		1
				moved		0
				dnka/cxl		4
				pap done		16
				letter sent		48
				pap clinic pending		0
				decline		2
				pap pending		24
				other		2
						99
