# Supplementary material for: Electronic data review, client reminders, and expanded clinic hours for improving cervical cancer screening rates after the COVID-19 pandemic shutdowns: A multicomponent quality improvement program
Source: eLife. 2023 Aug 22;12:e85724. doi: 10.7554/eLife.85724 (PMC10471159; doi:10.7554/eLife.85724)
Supplement: Figure 7—source data 7. [file elife-85724-fig7-data7.xlsx]

## Sheet: 804-904
Patient Number	Pap Clinic Date	Calls	Letter	Notes	2021-10-17	pap	colpo	leep
800		1st call	confidential	lvm
801		1st call	confidential	lvm
802	2021-06-09			pap was done with Pcp	done	nilm
803		1st call	letter sent	lvm/letter sent
804		1st call	confidential	lvm
805		1st call	letter sent	lvm/letter sent
806				Pt out of state not sure when she is back
807		1st call	confidential	phone not working
808	2021-06-26			pap was done	done	nilm
809	2021-06-21			pap was done	done	nilm
810				pt will call back
811		1st call	confidential	phone not working
812	2021-10-04	1st call		no show	dnka
813				pt changed her care
814	2021-05-11			pap was done with pcp	done	nilm
815				pt will out of state she will call back
816	2021-07-06			pap was done with PCP	done	not done
817		1st call	confidential	lvm
818		1st call	letter sent	unable to lvm
819		1st call		pt declined
820	2021-06-26			pap was done at bmc	OSC
821		1st call	confidential	lvm
822		1st call	letter sent	lvm/letter sent
823				message sent to pedi provider.		not done
824	2021-07-27			pap was done	done	nilm
825	2021-07-06			No show to 7/6	dnka
826		1st call	letter sent	lvm/letter sent
827		1st call	letter sent	lvm/letter sent
828		1st call		pt change her care to BMC
829	2021-07-06			pap was done	done	nilm
830	2021-07-14	1st call	letter sent	pap was done	done	nilm
831	2021-07-02			pap was done	done	nilm
832		1st call	letter sent	lvm/letter sent
833	2021-04-21			pap was done	done	nilm
834	2021-06-26			pt cancelled	cxl
835		1st call	confidential	lvm
836		1st call	letter sent	lvm/letter sent
837				Message sent pcp		not done
838		1st call	letter sent	lvm/letter sent
839		1st call	letter sent	lvm/letter sent
840				pt will call back
841		1st call	letter sent	lvm/letter sent
842		1st call	letter sent	lvm/letter sent
843				pt declined
844		1st call	letter sent	lvm/letter sent
845		1st call	letter sent	lvm/letter sent
846	2021-07-10			no show to 7/10	dnka
847	2021-05-24			pap was done	done	nilm
848		1st call	letter sent	lvm/letter sent
849		1st call	letter sent	lvm/letter sent
850		1st call	letter sent	lvm/letter sent
851		1st call	letter sent	lvm/letter sent
852	2021-07-10			pap was done	done	lsil	pap in a yr
853	2021-08-04			pap was done	done	nilm
854		1st call	letter sent	lvm/letter sent
855	2021-05-17			pap was done	done	nilm
856	2021-07-10			pap was done	done	nilm
857	2021-07-10			no show 7/10	dnka
858	2021-07-29			pap was done	done	nilm
859		1st call	letter sent	lvm/letter sent
860		1st call	letter sent	lvm/letter sent
861	2021-09-22			pap was done	done	nilm
862		1st call	letter sent	lvm/letter sent
863	2021-07-10			pap was done	done	nilm
864	2021-08-04			pap was done	done	nilm
865	2021-07-16			pap was done	done	HPV	pap in a yr
866	2021-05-06			pap was done	done	nilm
867	2021-09-24			dnka	dnka
868	2021-07-10			no show	dnka
869		1st call	letter sent	lvm/letter sent
870	2021-08-10			pap was done	done	nilm
871	2021-07-10			no show	dnka
872		1st call	letter sent	lvm/letter sent
873		1st call	letter sent	lvm/letter sent
874	2021-07-10			no show	dnka
875	2021-07-10			pap was done	done	nilm
876		1st call	letter sent	lvm/letter sent
877	2021-07-24			pap was done	done	nilm
878	2021-07-10			no show 7/10	dnka
879	9/16/21			dnka	dnka
880		1st call	letter sent	lvm/letter sent
881	2021-08-16			no show	dnka
882	2021-07-10	1st call	letter sent	no show 7/10/21	dnka
883		1st call	letter sent	lvm/letter sent
884		1st call	letter sent	lvm/letter sent
885	2021-08-16			pap was done	done	nilm
886	2021-06-25			outside EBNHC
887		1st call	letter sent	lvm/letter sent
888	2021-07-06			pap was done	done	nilm
889		1st call	letter sent	lvm/letter sent
890	2021-07-06			pap was done	done	nilm
891		1st call	letter sent	lvm/letter sent
892		1st call	letter sent	lvm/letter sent
893				pap done outside EBNHC
894	2021-05-18			pap was done	done	nilm
895		1st call	letter sent	lvm/letter sent
896	2021-07-10			pap was done	done	nilm
897				pt declined
898	2021-04-21			pap was done	done	nilm
899	2021-07-10	1st call	letter sent	no show7/10	dnka
900		1st call	letter sent	lvm/letter sent
2021-10-17	pcp		2
	OSC		5
	moved		0
	dnka/cxl		14
	already scheduled		0
	pap done		30
	letter sent		44
	pap clinic pending		0
	decline		6
	pap pending		0
			101
