# Supplementary material for: Electronic data review, client reminders, and expanded clinic hours for improving cervical cancer screening rates after the COVID-19 pandemic shutdowns: A multicomponent quality improvement program
Source: eLife. 2023 Aug 22;12:e85724. doi: 10.7554/eLife.85724 (PMC10471159; doi:10.7554/eLife.85724)
Supplement: Figure 7—source data 8. [file elife-85724-fig7-data8.xlsx]

## Sheet: Sheet1
Patient Number	Pap Clinic Date	Calls	Letter	Notes
901		1st call	confidential	lvm
902		1st call	confidential	lvm
903	2021-06-09			pap was done with Pcp
904		1st call	letter sent	lvm/letter sent
905		1st call	confidential	lvm
906		1st call	letter sent	lvm/letter sent
907				Pt out of state not sure when she is back
908		1st call	confidential	phone not working
909	2021-06-26			pap was done
910	2021-06-21			pap was done
911				pt will call back
912		1st call	confidential	phone not working
913	2021-10-04	1st call		no show
914				pt changed her care
915	2021-05-11			pap was done with pcp
916				pt will out of state she will call back
917	2021-07-06			pap was done with PCP
918		1st call	confidential	lvm
919		1st call	letter sent	unable to lvm
920		1st call		pt declined
921	2021-06-26			pap was done at bmc
922		1st call	confidential	lvm
923		1st call	letter sent	lvm/letter sent
924				message sent to pedi provider.
925	2021-07-27			pap was done
926	2021-07-06			No show to 7/6
927		1st call	letter sent	lvm/letter sent
928		1st call	letter sent	lvm/letter sent
929		1st call		pt change her care to BMC
930	2021-07-06			pap was done
931	2021-07-14	1st call	letter sent	pap was done
932	2021-07-02			pap was done
933		1st call	letter sent	lvm/letter sent
934	2021-04-21			pap was done
935	2021-06-26			pt cancelled
936		1st call	confidential	lvm
937		1st call	confidential	lvm
938	2021-06-09			pap was done with Pcp
939		1st call	letter sent	lvm/letter sent
940		1st call	confidential	lvm
941		1st call	letter sent	lvm/letter sent
942				Pt out of state not sure when she is back
943		1st call	confidential	phone not working
944	2021-06-26			pap was done
945	2021-06-21			pap was done
946				pt will call back
947		1st call	confidential	phone not working
948	2021-10-04	1st call		no show
949				pt changed her care
950	2021-05-11			pap was done with pcp
951				pt will out of state she will call back
952	2021-07-06			pap was done with PCP
953		1st call	confidential	lvm
954		1st call	letter sent	unable to lvm
955		1st call		pt declined
956	2021-06-26			pap was done at bmc
957		1st call	confidential	lvm
958		1st call	letter sent	lvm/letter sent
959				message sent to pedi provider.
960	2021-07-27			pap was done
961	2021-07-06			No show to 7/6
962		1st call	letter sent	lvm/letter sent
963		1st call	letter sent	lvm/letter sent
964		1st call		pt change her care to BMC
965	2021-07-06			pap was done
966	2021-07-14	1st call	letter sent	pap was done
967	2021-07-02			pap was done
968		1st call	letter sent	lvm/letter sent
969	2021-04-21			pap was done
970	2021-06-26			pt cancelled
971	2021-06-26			no show
972				moved
973	2021-07-23			pt requested Friday
974				Message sent to pcp
975	2021-07-14	R/s from 6/26
976	2021-07-06
977	2021-05-21			pap was done with pcp
978		1st call	letter sent	lvm/letter sent
979		1st call	letter sent	lvm/letter sent
980	2021-04-30			pap was done with Dr Dani
981	2021-07-06
982		1st call	letter sent	lvm/letter sent
983		1st call	letter sent	unable to lvm
984		1st call	letter sent	unable to lvm
985	2021-07-10	R/s from 6/26
986	2021-06-23			pap was done with pcp
987	2021-07-06
988	2021-08-10
989		1st call	letter sent	lvm/letter sent
990		1st call	letter sent	lvm/letter sent
991	2021-07-06			ready schedule with PCP
992		1st call	letter sent	lvm/letter sent
993	2021-05-11			pap was done
994	2021-07-06
995	2021-06-04			pap was done with pcp
996		1st call	confidential	unable to lvm or send a letter
997		1st call	letter sent	lvm/letter sent
998		1st call	confidential	lvm/letter sent
999		1st call	letter sent	unable to lvm
1000	2021-05-14			pap was done with PCP
1001	2021-07-06
1002		1st call	confidential	lvm/unable to send letter
1003	2021-06-26			no show
1004	2021-06-26			no show
1005
1006	2021-07-23			pt requested Friday
1007				Message sent to pcp
1008	2021-07-14	R/s from 6/26
1009	2021-07-06
1010	2021-05-21			pap was done with pcp
1011		1st call	letter sent	lvm/letter sent
1012		1st call	letter sent	lvm/letter sent
1013	2021-04-30			pap was done with Dr Dani
1014	2021-07-06
1015		1st call	letter sent	lvm/letter sent
1016		1st call	letter sent	unable to lvm
1017		1st call	letter sent	unable to lvm
1018	2021-07-10	R/s from 6/26
1019	2021-06-23			pap was done with pcp
1020	2021-07-06
1021	2021-08-10
1022		1st call	letter sent	lvm/letter sent
1023		1st call	letter sent	lvm/letter sent
1024	2021-07-06			ready schedule with PCP
1025		1st call	letter sent	lvm/letter sent
1026	2021-05-11			pap was done
1027	2021-07-06
1028	2021-06-04			pap was done with pcp
1029		1st call	confidential	unable to lvm or send a letter
1030		1st call	letter sent	lvm/letter sent
1031		1st call	confidential	lvm/letter sent
1032		1st call	letter sent	unable to lvm
1033	2021-05-14			pap was done with PCP
1034	2021-07-06
1035		1st call	confidential	lvm/unable to send letter
1036	2021-06-26			no show
1037	2021-07-06			pap was done with PCP
1038		1st call	confidential	lvm
1039		1st call	letter sent	unable to lvm
1040		1st call		pt declined
1041	2021-06-26			pap was done at bmc
1042		1st call	confidential	lvm
1043		1st call	letter sent	lvm/letter sent
1044				message sent to pedi provider.
1045	2021-07-27			pap was done
1046	2021-07-06			No show to 7/6
1047		1st call	letter sent	lvm/letter sent
1048		1st call	letter sent	lvm/letter sent
1049		1st call		pt change her care to BMC
1050	2021-07-06			pap was done
1051	2021-07-14	1st call	letter sent	pap was done
1052	2021-07-02			pap was done
1053		1st call	letter sent	lvm/letter sent
1054	2021-04-21			pap was done
1055	2021-06-26			pt cancelled
1056		1st call	confidential	lvm
1057	2021-05-18	call to r/s	letter sent	no show to 5/18
1058		2nd call	letter sent	lvm/letter sent
1059		2nd call	letter sent	lvm/letter sent
1060				pt cancelled pap was done last year at Beth Israel
1061		1st call 4/28		pt will call back
1062		1st call 4/29		pt states she will call back
1063		2nd call	letter sent	lvm/letter sent
1064		2nd call	letter sent	lvm/letter sent
1065	2021-06-12			pap was done
1066	2021-07-09
1067				pt declined to schedule an appt.
1068		2nd call		pt will call back to schedule
1069		2nd call	letter sent	lvm/letter sent
1070	2021-05-19			pap was done
1071	2021-05-19			pap was done
1072		2nd call	letter sent	unable to lvm
1073	2021-05-19	no show	letter sent	no show to 5/19
1074				pt declined to have a pap
1075		2nd call	letter sent	lvm/letter sent
1076	2021-06-12			no show
1077	2021-05-07			pap done
1078	2021-05-19	call r/s to 5/19/21		no show 5/5 and 5/19 letter sent
1079	2021-05-17			pap was done
1080		1st call 4/29	letter sent	unable to lvm
1081	2021-06-12			pap was done
1082				Pt declined pap due to no insurance.
1083		1st call on 4/30/21		lvm /letter sent
1084				Pt Declined to have a pap.
1085		1st call on 4/30/21		Pt will call back to schedule her pap.
1086		1st call on 4/30/21		lvm /letter sent
1087		1st call on 4/30/21		lvm /letter sent
1088		1st call on 4/30/21	letter sent	lvm/letter sent
1089	2021-05-05			pap was done with pcp
1090	2021-05-19			pap was done
1091	2021-05-19			pap was done
1092	2021-05-05			Hyst not documented in chart: HM corrected
1093	2021-05-05	call to r/s	letter sent	pt canceled
1094		2nd call 04/27/21	letter sent	lvm/letter mailed 04/27/21
1095		1st call 4/21/21	letter sent	Mailbox full/letter mailed 04/22/21
1096	2021-05-25	pt cancelled twice		cancelled 5/5 and 5/25
1097	2021-05-05	call to r/s	letter sent	no show
1098	2021-06-30			Pt no show have appt on 5/25 with Dani
1099		2ND CALL 04/27/21	letter sent	Letter mailed 04/27/21
1100	2021-05-05			pap was done
1101		2nd CALL 04/27/21	letter sent	lvm/letter mailed 04/27/21
1102		had pap at TUFTS	HM updated	Pap @TUFTs is up to date
1103	2021-05-05			pap was done
1104		2nd CALL 04/27/21	letter sent	lvm/letter mailed 04/27/21
1105		2nd CALL 04/22/21	letter sent	lvm/letter mailed 04/27/21
1106	2021-05-05			pap was done
1107	2021-05-05			pap was done
1108	2021-05-05			pap was done
1109	2021-07-21	no show 6/8		Scheduled for Repap with PamSchuster
1110	2021-05-05			Hyst not documented in chart: HM corrected
1111	2021-05-05	call to r/s	letter sent	pt canceled
1112		2nd call 04/27/21	letter sent	lvm/letter mailed 04/27/21
1113		1st call 4/21/21	letter sent	Mailbox full/letter mailed 04/22/21
1114	2021-05-25	pt cancelled twice		cancelled 5/5 and 5/25
1115	2021-05-05	call to r/s	letter sent	no show
1116	2021-06-30			Pt no show have appt on 5/25 with Dani
1117		2ND CALL 04/27/21	letter sent	Letter mailed 04/27/21
1118	2021-05-05			pap was done
1119		2nd CALL 04/27/21	letter sent	lvm/letter mailed 04/27/21
1120		had pap at TUFTS	HM updated	Pap @TUFTs is up to date
1121	2021-05-05			pap was done
1122		2nd CALL 04/27/21	letter sent	lvm/letter mailed 04/27/21
1123		2nd CALL 04/22/21	letter sent	lvm/letter mailed 04/27/21
1124	2021-05-05			pap was done
1125	2021-05-05			pap was done
1126	2021-05-05			pap was done
1127	2021-07-21	no show 6/8		Scheduled for Repap with PamSchuster
1128		1st call on 4/30/21		lvm /letter sent
1129		1st call on 4/30/21		lvm /letter sent
1130		1st call on 4/30/21	letter sent	lvm/letter sent
1131	2021-05-05			pap was done with pcp
1132	2021-05-19			pap was done
1133	2021-05-19			pap was done
1134	2021-05-19	call r/s to 5/19/21		no show 5/5 and 5/19 letter sent
1135	2021-05-17			pap was done
1136		1st call 4/29	letter sent	unable to lvm
1137	2021-05-18	call to r/s	letter sent	no show to 5/18
1138		2nd call	letter sent	lvm/letter sent
1139		2nd call	letter sent	lvm/letter sent
1140				pt cancelled pap was done last year at Beth Israel
1141		1st call 4/28		pt will call back
1142		1st call 4/29		pt states she will call back
1143		2nd call	letter sent	lvm/letter sent
1144		2nd call	letter sent	lvm/letter sent
1145	2021-06-12			pap was done
1146	2021-07-09
1147				pt declined to schedule an appt.
1148		2nd call		pt will call back to schedule
1149		2nd call	letter sent	lvm/letter sent
1150	2021-05-19			pap was done
1151	2021-05-19			pap was done
1152		2nd call	letter sent	unable to lvm
1153	2021-05-19	no show	letter sent	no show to 5/19
1154				pt declined to have a pap
1155		2nd call	letter sent	lvm/letter sent
